# Supplementary material for: Tandem cycloaddition–decarboxylation of α-keto acid and isocyanide under oxidant-free conditions towards monosubstituted oxazoles
Source: Royal Society of Chemistry journal article supplement (doi:10.1039/c6ra16031j), 2016-01-01

Electronic Supporting Information

**Tandem cycloaddition-decarboxylation of  $\alpha$ -keto acid and isocyanide under oxidant-free condition towards monosubstituted oxazoles**

Ling-Juan Zhang, Mei-Chen Xu, Jie Liu, Xian-Ming Zhang\*

*School of Chemistry & Material Science, Shanxi Normal University Linfen 041000, P. R. China.*

**Contents**

|                                                                                                             |    |
|-------------------------------------------------------------------------------------------------------------|----|
| 1、 General Considerations .....                                                                             | S1 |
| 2、 Experimental procedure for preparation of substituted $\alpha$ -oxocarboxylic acids <sup>[1]</sup> ..... | S1 |
| 3、 Experimental procedure for the synthesis of oligosubstituted oxazoles( <b>3a-m</b> ) .....               | S1 |
| 4、 Characterization of Products .....                                                                       | S2 |
| 5、 References .....                                                                                         | S6 |
| 6、 <sup>1</sup> H NMR and <sup>13</sup> C NMR Spectra of Products .....                                     | S7 |

## 1、 General Considerations

All chemicals were received from chemical suppliers commercially without further purification. All  $^1\text{H}$  NMR and  $^{13}\text{C}$  NMR spectra were obtained on a 600 MHz spectrometer in  $\text{CDCl}_3$  with TMS as internal standard at room temperature. Gas chromatography (GC) analyses were recorded by Agilent 7820A (FID detector from AGILENT 7820). Thin layer chromatography (TLC) was employed with glass 0.25 mm silica gel plates. Column chromatography was performed on silica gel (200–300 mesh). High-resolution mass spectra (HRMS) were obtained using a Bruker microTOFII focus spectrometer(ESI).

## 2、 Experimental procedure for preparation of substituted $\alpha$ -oxocarboxylic acids<sup>[1]</sup>

Corresponding methyl ketones were oxidated with excess  $\text{SeO}_2$  to obtain all kinds of desired substituted  $\alpha$ -oxocarboxylic acids according to previous literatures. In addition, pyruvate(**1n**) was directly provided by the supplier.

## 3、 Experimental procedure for the synthesis of monosubstituted oxazoles (**3a-m**)

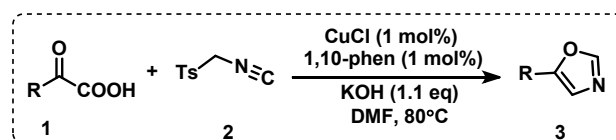

**General procedure for the synthesis of 3a:** To a 5 mL round bottom flask, the mixture of  $\alpha$ -oxo-2-phenylacetic acid **1a** (0.55 mmol, 83.3 mg) and  $\text{KOH}$  (0.55 mmol, 25.3 mg) in  $\text{DMF}$  (1 mL), was stirred at room temperature for 1 h. After **1a** was consumed traced by TLC, TosMIC **2** (0.5 mmol, 97.6 mg) and  $\text{CuCl}$  (1 mol%, 1.3 mg)/1,10-Phenanthroline (1 mol%, 0.9 mg) was added. The vial was stirring in oil bath at  $80^\circ\text{C}$  for another 5 hours in air atmosphere, and monitored by TLC. Followed by TosMIC (**2**) was exhausted completely, the reaction was cooled down to room temperature and quenched in (10 mL) saturated  $\text{NaCl}$  solution then extracted with  $\text{EtOAc}$  ( $3 \times 10$  mL). Organic layers was combined and solvent was evaporated, then the residue was purified by flash column chromatography (petroleum ether : ethyl acetate = 9 : 1) to get 5-phenyloxazole **3a** as yellow liquid.

#### 4、Characterizations of Products

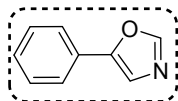

##### 5-phenyloxazole (3a)<sup>[2]</sup>

Yellow liquid. <sup>1</sup>H NMR (600 MHz, CDCl<sub>3</sub>) δ 7.93 (s, 1H), 7.67–7.65 (m, 2H), 7.44–7.42 (m, 2H), 7.35 (s, 1H), 7.34–7.33 (m, 1H). <sup>13</sup>C NMR (150 MHz, CDCl<sub>3</sub>) δ 151.6, 150.5, 128.9, 128.7, 127.7, 124.4, 121.4. HRMS (ESI-TOF) Calcd for C<sub>9</sub>H<sub>8</sub>NO ([M+H]<sup>+</sup>) 146.0600. Found 146.0601.

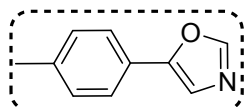

##### 5-(p-tolyl)oxazole (3b)<sup>[3, 4]</sup>

Yellow solid. <sup>1</sup>H NMR (600 MHz, CDCl<sub>3</sub>) δ 7.89 (s, 1H), 7.55 (d, *J* = 8.4 Hz, 2H), 7.31 (s, 1H), 7.25 (d, *J* = 8.4 Hz, 2H), 2.39 (s, 3H). <sup>13</sup>C NMR (150 MHz, CDCl<sub>3</sub>) δ 150.7, 149.1, 137.7, 128.6, 124.0, 123.3, 119.8, 20.3. HRMS (ESI-TOF) Calcd for C<sub>10</sub>H<sub>10</sub>NO ([M+H]<sup>+</sup>) 160.0761. Found 160.0766.

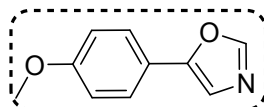

##### 5-(4-methoxyphenyl)oxazole (3c)<sup>[3]</sup>

Yellow solid. <sup>1</sup>H NMR (600 MHz, CDCl<sub>3</sub>) δ 7.88 (s, 1H), 7.60–7.58 (m, 2H), 7.23 (s, 1H), 6.97–6.95 (m, 2H), 3.85 (s, 3H). <sup>13</sup>C NMR (150 MHz, CDCl<sub>3</sub>) δ 159.9, 151.6, 149.9, 125.9, 120.6, 120.0, 114.4, 55.4. HRMS (ESI-TOF) Calcd for C<sub>10</sub>H<sub>10</sub>NO<sub>2</sub> ([M+H]<sup>+</sup>) 176.0706. Found 176.0710.

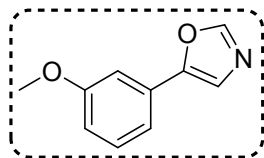

##### 5-(3-methoxyphenyl)oxazole (3d)

Yellow liquid. <sup>1</sup>H NMR (600 MHz, CDCl<sub>3</sub>) δ 7.92 (s, 1H), 7.36–7.35 (m, 1H), 7.34–7.33 (d, *J* = 7.8 Hz, 1H), 7.26–7.25 (d, *J* = 7.8 Hz, 1H), 7.20–7.18 (m, 1H), 6.90 (m, 1H), 3.86 (s, 3H). <sup>13</sup>C NMR (150 MHz, CDCl<sub>3</sub>) δ 160.0, 151.4, 150.5, 130.1, 129.0,

121.8, 116.9, 114.4, 109.8, 55.4. HRMS (ESI-TOF) Calcd for C<sub>10</sub>H<sub>10</sub>NO<sub>2</sub> ([M+H]<sup>+</sup>) 176.0706. Found 176.0710.

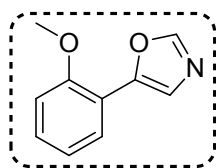

### 5-(2-methoxyphenyl)oxazole (3e)

Yellow liquid. <sup>1</sup>H NMR (600 MHz, CDCl<sub>3</sub>) δ 7.91 (s, 1H), 7.79 (d, *J* = 8.4 Hz, 1H), 7.57 (s, 1H), 7.32 (t, *J* = 7.8 Hz, *J* = 15.6 Hz, 1H), 7.06 (s, *J* = 7.2 Hz, *J* = 15.0 Hz, 1H), 7.00 (d, *J* = 8.4 Hz, 1H), 3.98 (s, 3H). <sup>13</sup>C NMR (150 MHz, CDCl<sub>3</sub>) δ 155.7, 149.5, 129.3, 126.1, 125.5, 120.8, 117.0, 110.9, 55.5. HRMS (ESI-TOF) Calcd for C<sub>10</sub>H<sub>10</sub>NO<sub>2</sub> ([M+H]<sup>+</sup>) 176.0706. Found 176.0710.

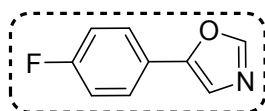

### 5-(4-fluorophenyl)oxazole (3f)<sup>31</sup>

Yellow solid. <sup>1</sup>H NMR (600 MHz, CDCl<sub>3</sub>) δ 7.91 (s, 1H), 7.65-7.62 (m, 2H), 7.30 (s, 1H), 7.14-7.11 (m, 2H). <sup>13</sup>C NMR (150 MHz, CDCl<sub>3</sub>) δ 163.7, 162.1, 150.5, 126.5, 124.2, 121.2, 116.1. <sup>19</sup>F NMR δ 104.1. HRMS (ESI-TOF) Calcd for C<sub>9</sub>H<sub>7</sub>FNO ([M+H]<sup>+</sup>) 164.0386. Found 164.0381.

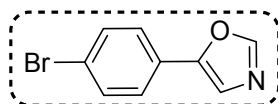

### 5-(4-bromophenyl)oxazole (3g)

Yellow solid. <sup>1</sup>H NMR (600 MHz, CDCl<sub>3</sub>) δ 7.86 (s, 1H), 7.55-7.50 (m, 4H), 7.36 (s, 1H). <sup>13</sup>C NMR (150 MHz, CDCl<sub>3</sub>) δ 152.0, 149.7, 131.1, 125.6, 124.8, 121.6, 120.9. HRMS (ESI-TOF) Calcd for C<sub>9</sub>H<sub>7</sub>BrNO ([M+H]<sup>+</sup>) 223.9567. Found 223.9562.

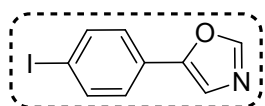

### 5-(4-iodophenyl)oxazole (3h)

Yellow solid. <sup>1</sup>H NMR (600 MHz, CDCl<sub>3</sub>) δ 7.93 (s, 1H), 7.77-7.76 (m, 2H), 7.40-7.38 (m, 2H), 7.38 (s, 1H). <sup>13</sup>C NMR (150 MHz, CDCl<sub>3</sub>) δ 150.7, 138.1, 127.2, 126.0,

122.1, 94.2. HRMS (ESI-TOF) Calcd for C<sub>9</sub>H<sub>7</sub>INO ([M+H]<sup>+</sup>) 271.9567. Found 271.9561.

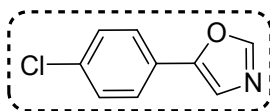

**5-(4-chlorophenyl)oxazole (3i)<sup>[3]</sup>**

Yellow solid. <sup>1</sup>H NMR (600 MHz, CDCl<sub>3</sub>) δ 7.92 (s, 1H), 7.59 (d, *J* = 8.4 Hz, 2H), 7.40 (d, *J* = 9.0 Hz, 2H), 7.35 (s, 1H). <sup>13</sup>C NMR (150 MHz, CDCl<sub>3</sub>) δ 150.6, 134.5, 129.2, 126.3, 125.7, 121.9. HRMS (ESI-TOF) Calcd for C<sub>9</sub>H<sub>7</sub>ClNO ([M]<sup>+</sup>) 179.0138. Found 179.0143.

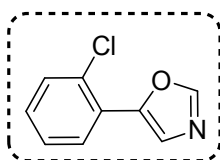

**5-(2-chlorophenyl)oxazole (3j)**

Yellow liquid. <sup>1</sup>H NMR (600 MHz, CDCl<sub>3</sub>) δ 7.98 (s, 1H), 7.82 (d, *J* = 8.4 Hz, 1H), 7.80 (s, 1H), 7.49 (d, *J* = 7.8 Hz, 1H), 7.36 (t, *J* = 7.2 Hz, *J* = 15.0 Hz, 1H), 7.28 (t, *J* = 7.2 Hz, *J* = 15.0 Hz, 1H). <sup>13</sup>C NMR (150 MHz, CDCl<sub>3</sub>) δ 151.9, 150.3, 148.1, 130.7, 129.3, 127.9, 127.1, 126.6, 126.4. HRMS (ESI-TOF) Calcd for C<sub>9</sub>H<sub>7</sub>ClNO ([M]<sup>+</sup>) 179.0138. Found 179.0143.

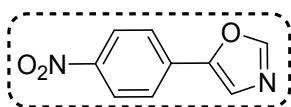

**5-(4-nitrophenyl)oxazole (3k)<sup>[3]</sup>**

Yellow solid. <sup>1</sup>H NMR (600 MHz, CDCl<sub>3</sub>) δ 8.31 (d, *J* = 9.0 Hz, 2H), 8.04 (s, 1H), 7.83 (d, *J* = 9.0 Hz, 2H), 7.58 (s, 1H). <sup>13</sup>C NMR (150 MHz, CDCl<sub>3</sub>) δ 150.8, 148.5, 146.4, 132.4, 123.8, 123.8, 123.5. HRMS (ESI-TOF) Calcd for C<sub>9</sub>H<sub>7</sub>N<sub>2</sub>O<sub>3</sub> ([M+H]<sup>+</sup>) 191.0451. Found 191.0446.

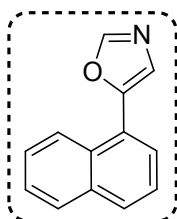

**5-(naphthalen-1-yl)oxazole (3l)**

Yellow solid.  $^1\text{H}$  NMR (600 MHz,  $\text{CDCl}_3$ )  $\delta$  8.25 (d,  $J = 8.3$  Hz, 1H), 8.07 (s, 1H), 7.92 – 7.91 (m, 2H), 7.75 (dd,  $J = 7.2$  Hz,  $J = 0.6$  Hz, 1H), 7.57–7.53 (m, 3H), 7.46 (s, 1H).  $^{13}\text{C}$  NMR (150 MHz,  $\text{CDCl}_3$ )  $\delta$  149.8, 149.8, 132.8, 129.2, 128.8, 127.7, 126.1, 125.7, 125.3, 124.3, 124.1, 123.9, 123.8. HRMS (ESI-TOF) Calcd for  $\text{C}_{13}\text{H}_{10}\text{NO}$  ( $[\text{M}+\text{H}]^+$ ) 196.0772. Found 196.0777.

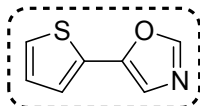

**5-(thiophen-2-yl)oxazole (3m)**

Yellow liquid.  $^1\text{H}$  NMR (600 MHz,  $\text{CDCl}_3$ )  $\delta$  7.86 (s, 1H), 7.35 (dd,  $J = 4.8$  Hz,  $J = 1.2$  Hz, 1H), 7.33 (dd,  $J = 3.6$  Hz,  $J = 1.2$  Hz, 1H), 7.22 (s, 1H), 7.09 (dd,  $J = 3.6$  Hz,  $J = 1.2$  Hz, 1H).  $^{13}\text{C}$  NMR (150 MHz,  $\text{CDCl}_3$ )  $\delta$  148.9, 146.1, 128.5, 126.8, 124.9, 123.7, 120.2. HRMS (ESI-TOF) Calcd for  $\text{C}_7\text{H}_4\text{NOS}$  ( $[\text{M}-\text{H}]^+$ ) 150.0092. Found 150.0088.

## 5、References

- [1]. K. Wadhwa, C. Yang, P. R. West, K.C. Deming, S.R. Chemburkar, R. E. Reddy. *Syn. Commun.* **2008**, *38*(24), 4434-4444.
- [2]. N. A. Strotman, H. R. Chobanian, Y. Guo, J. He, J. E. Wilson. *Org. Lett.* **2010**, *12*(16), 3578-3581.
- [3]. A. G. M. Barrett, S. M. Cramp, A. J. Hennessy, P. A. Procopiou, R. S. Roberts. *Org. Lett.* **2001**, *3*(2), 271-273.
- [4]. B. A. Kulkarni, A. Ganesan. *Tetrahedron Lett.* **1999**, *40*, 5637-5638.

## 6、<sup>1</sup>HNMR and <sup>13</sup>CNMR Spectra of Products

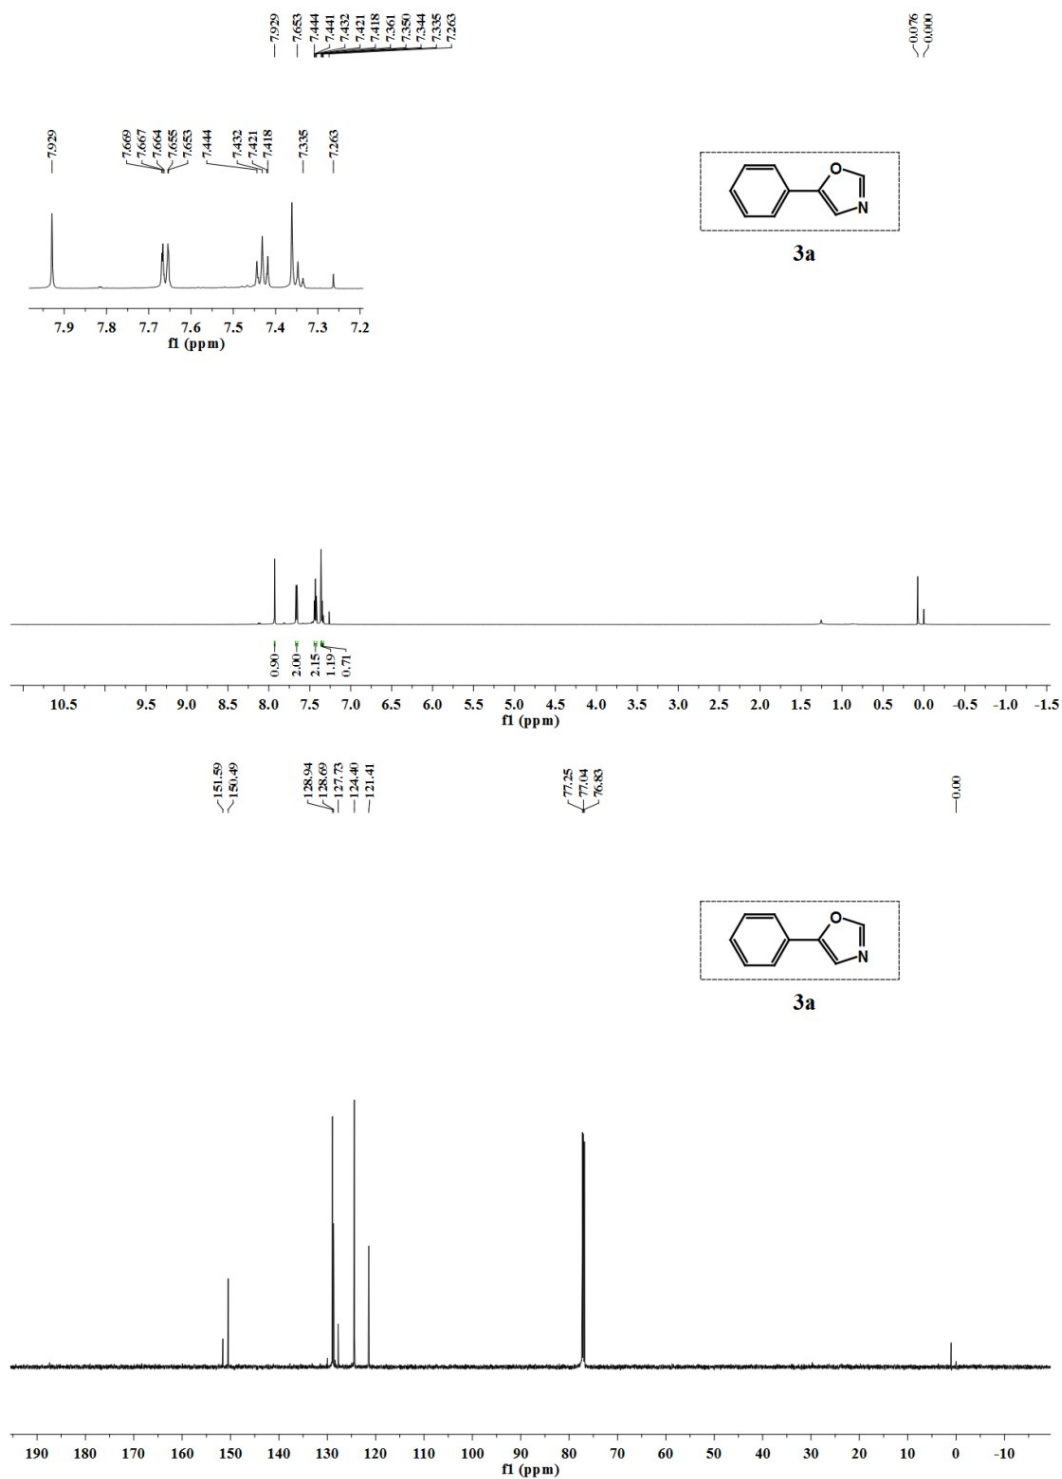



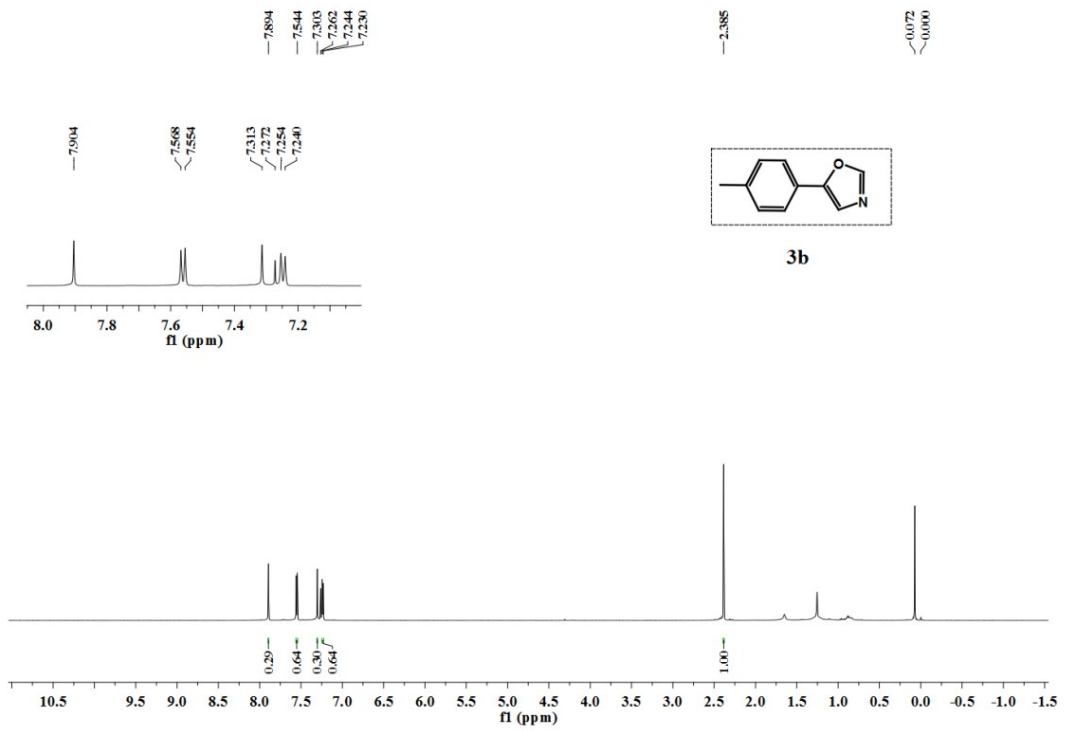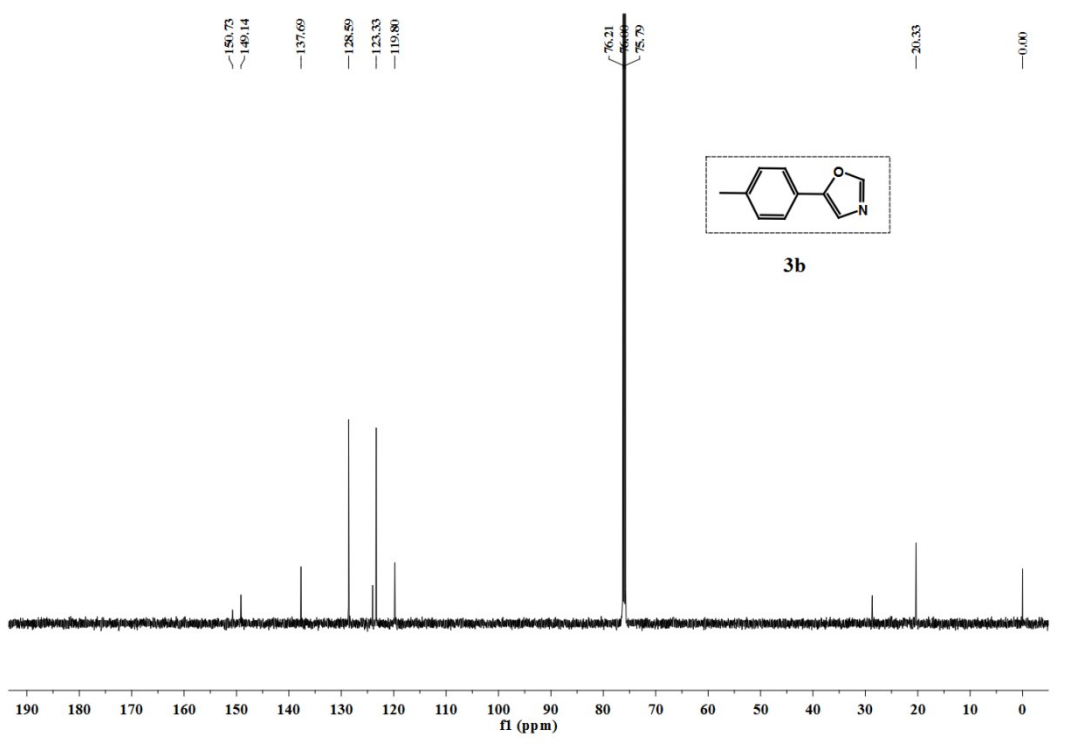

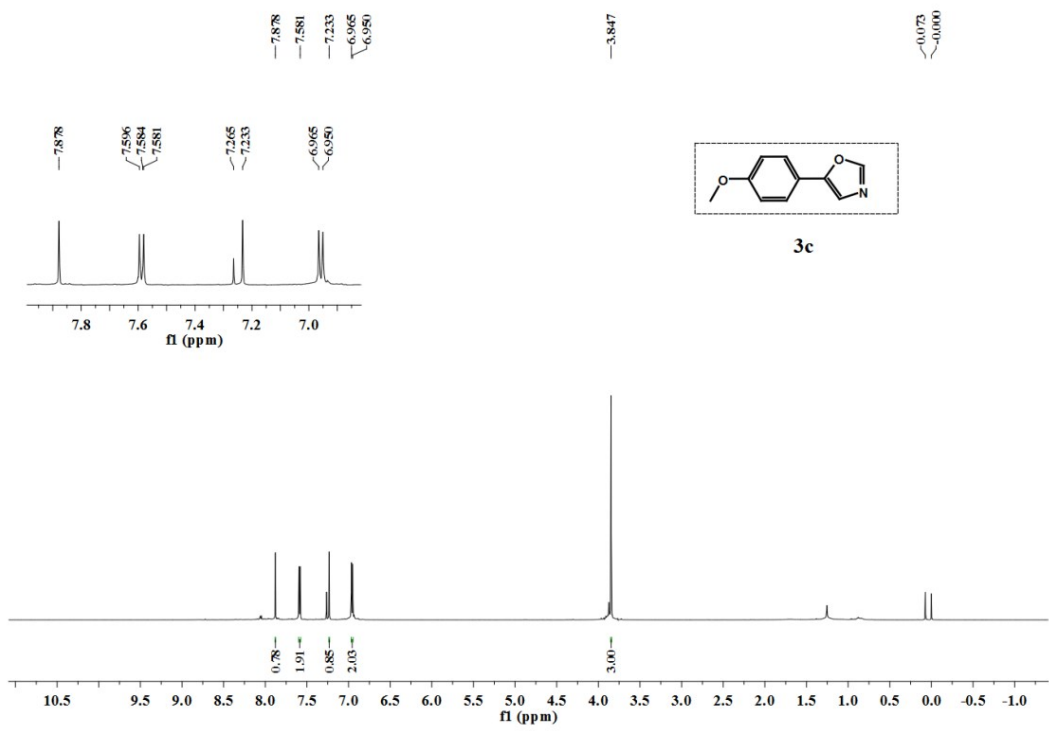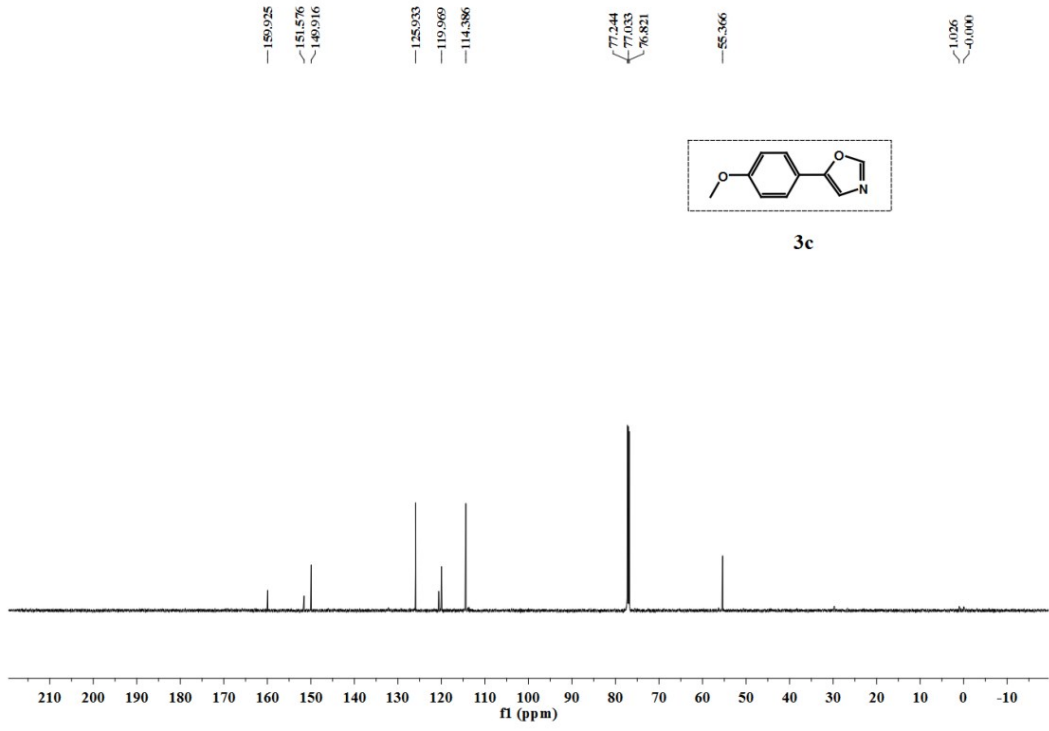

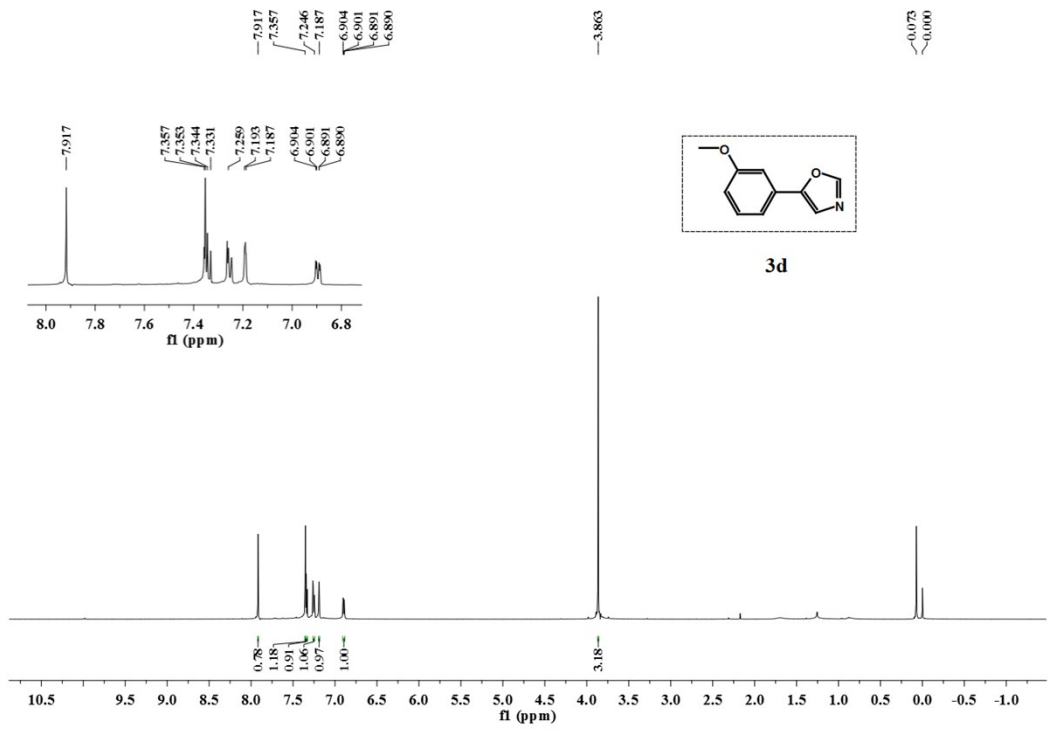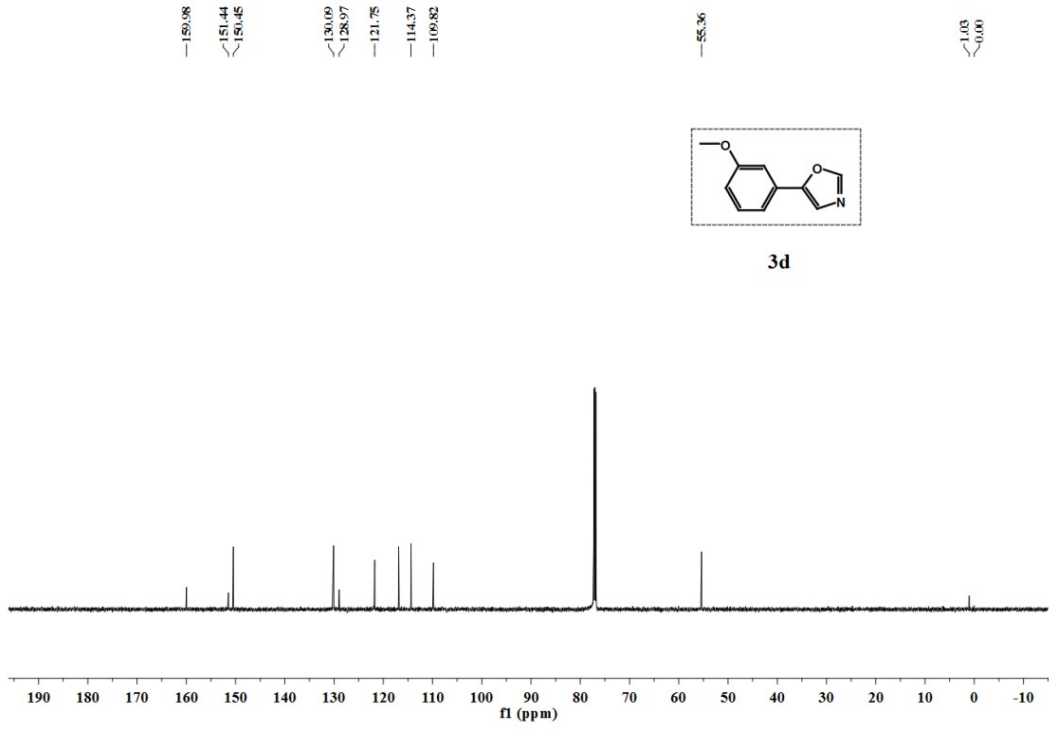

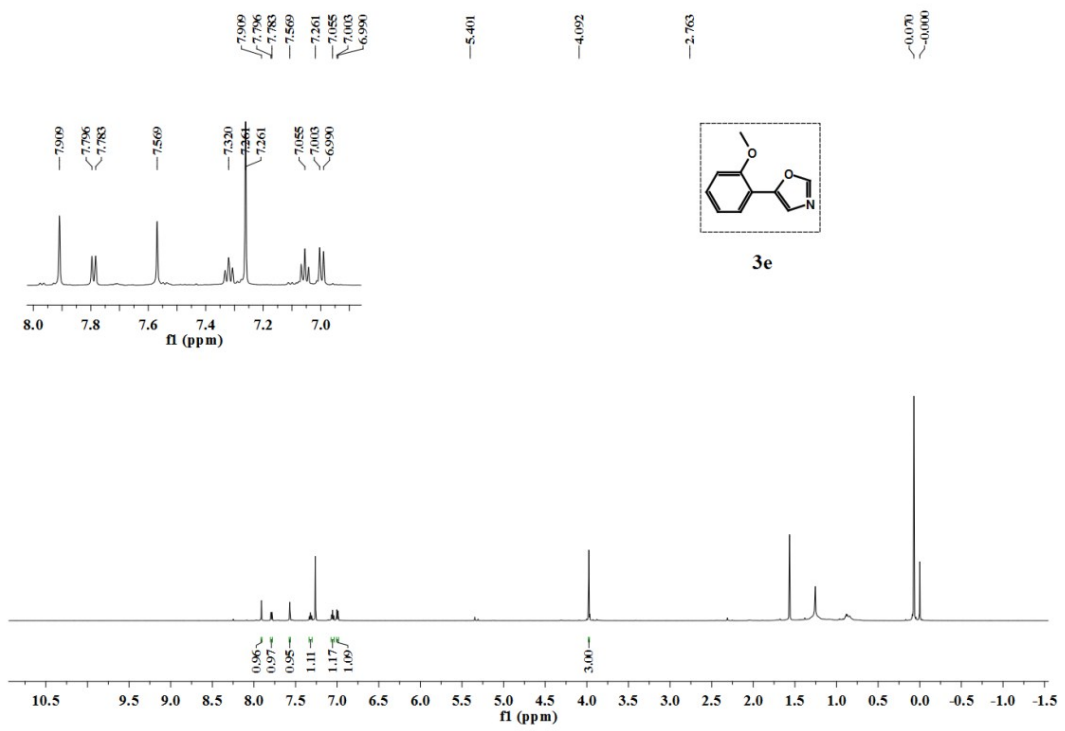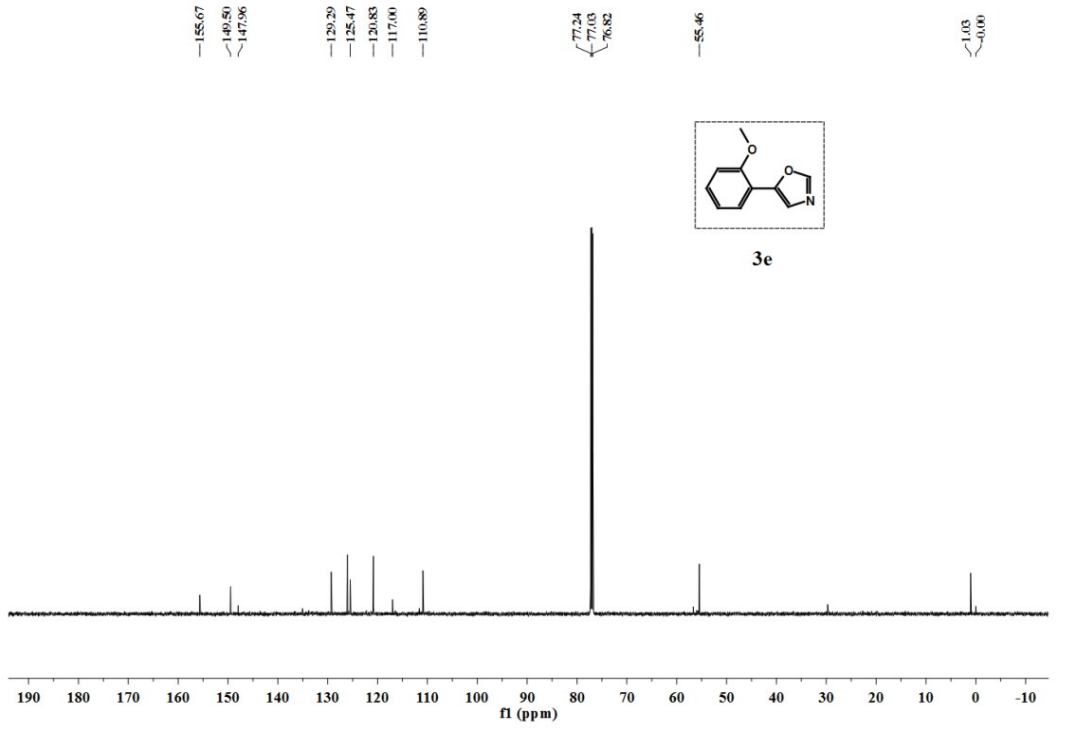

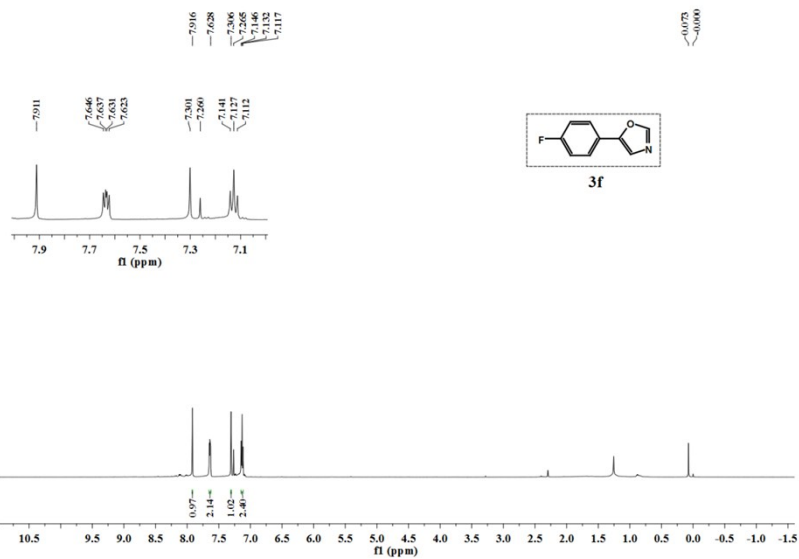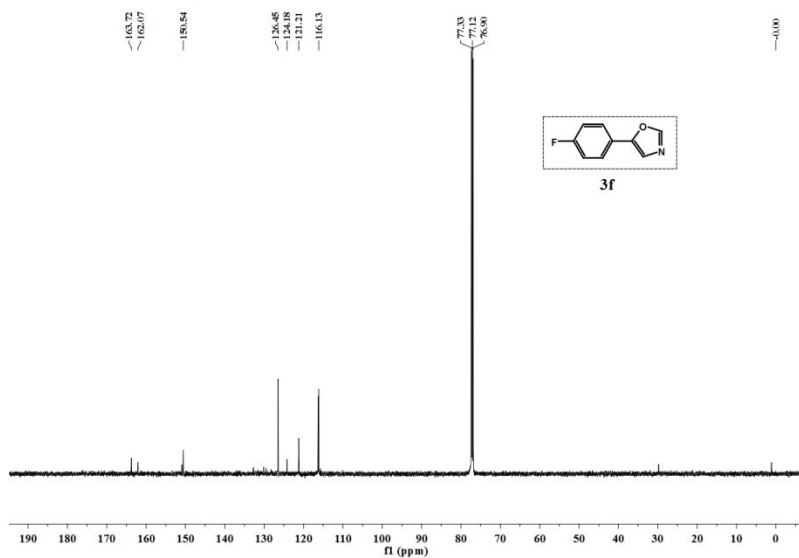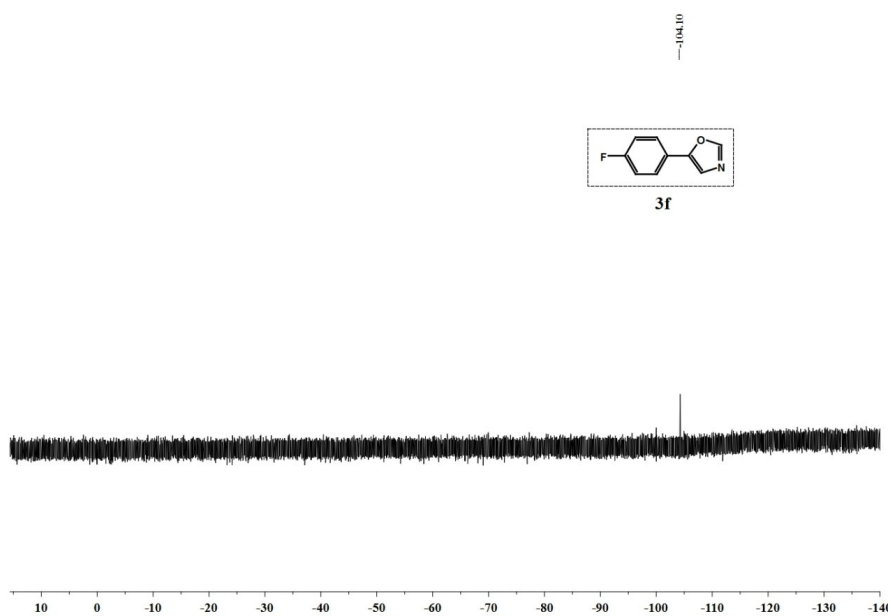

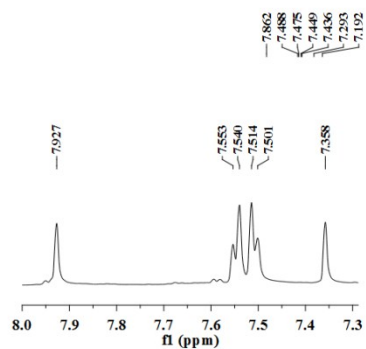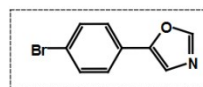

3g

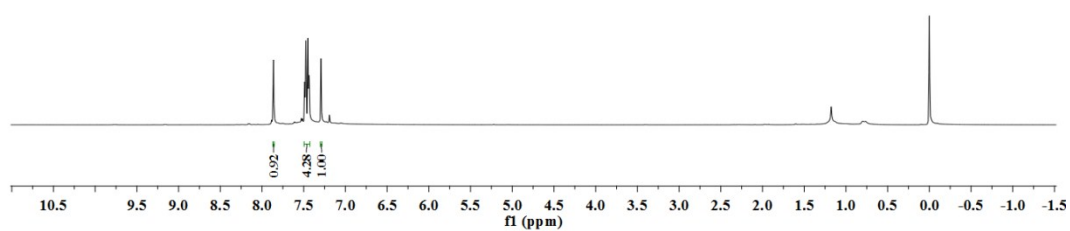

151.96  
149.67

131.14  
124.84  
121.62  
120.86

76.23  
76.02  
75.81

0.000

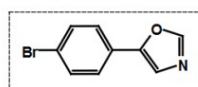

3g

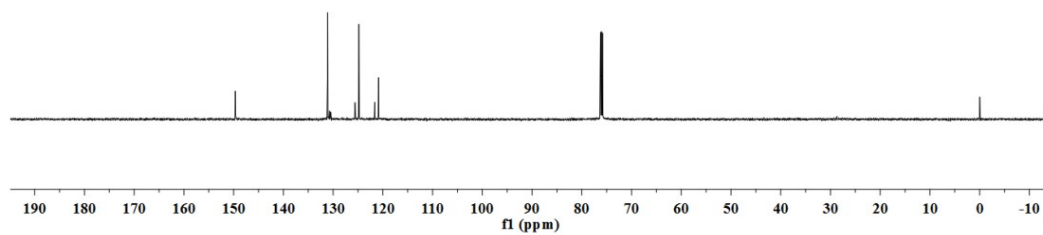

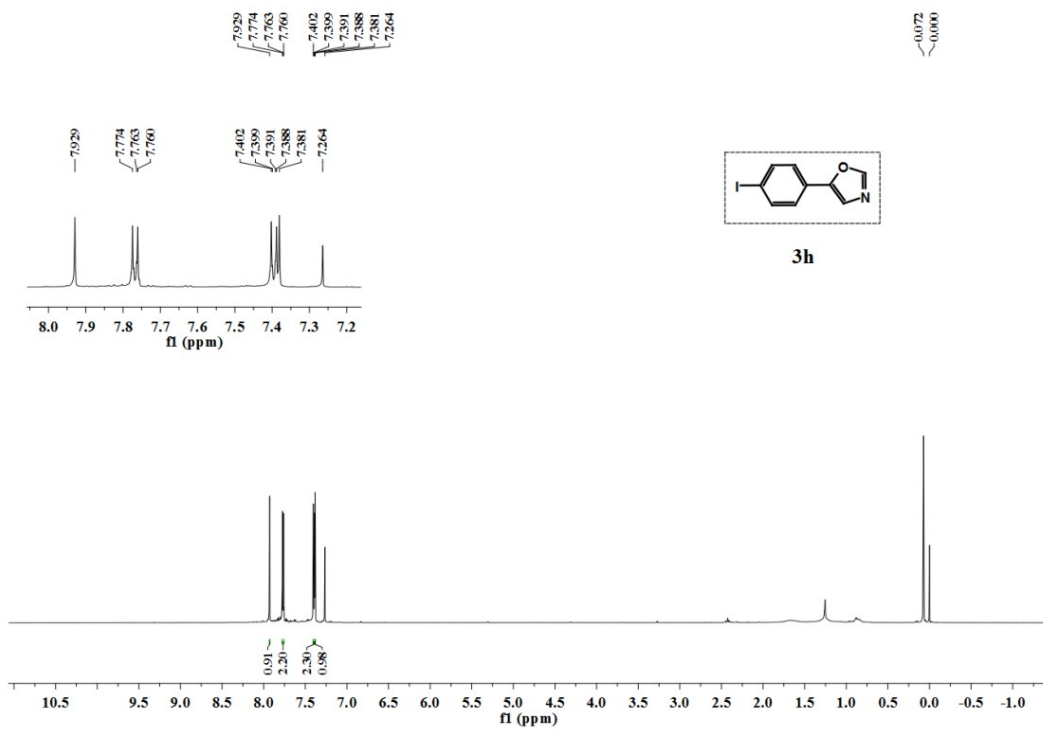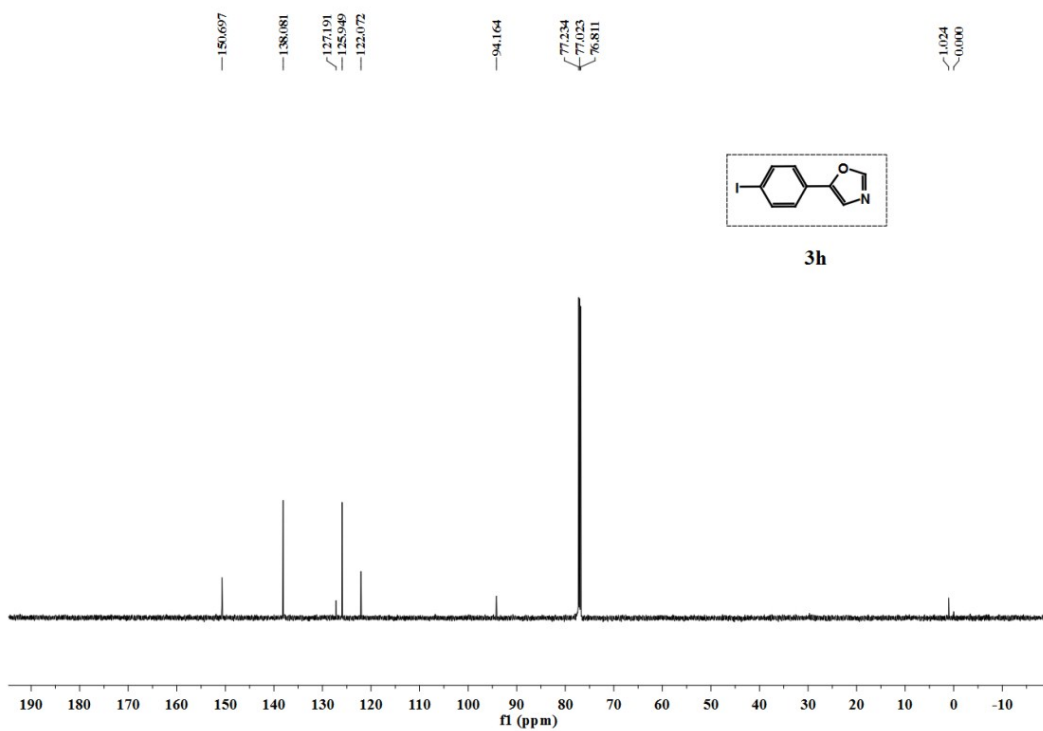

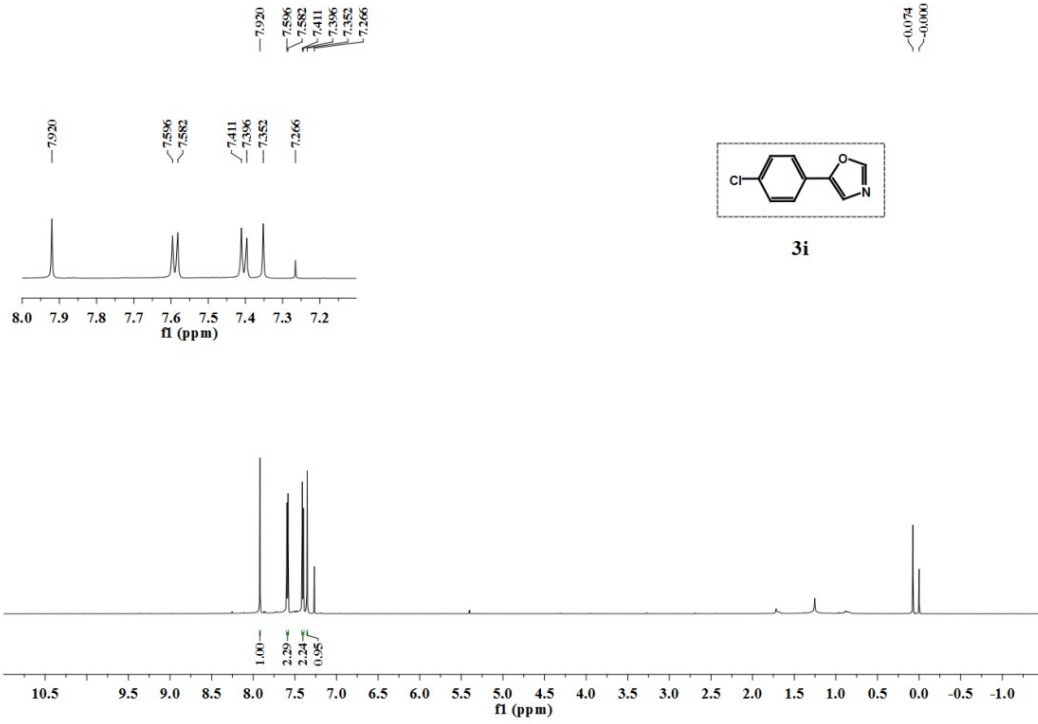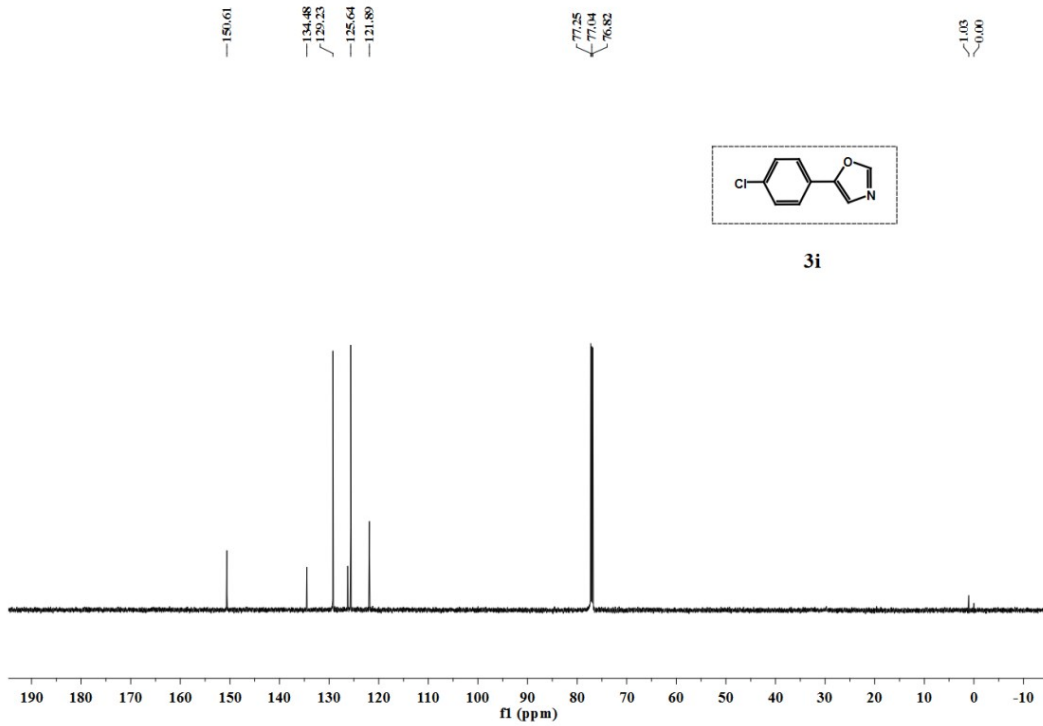



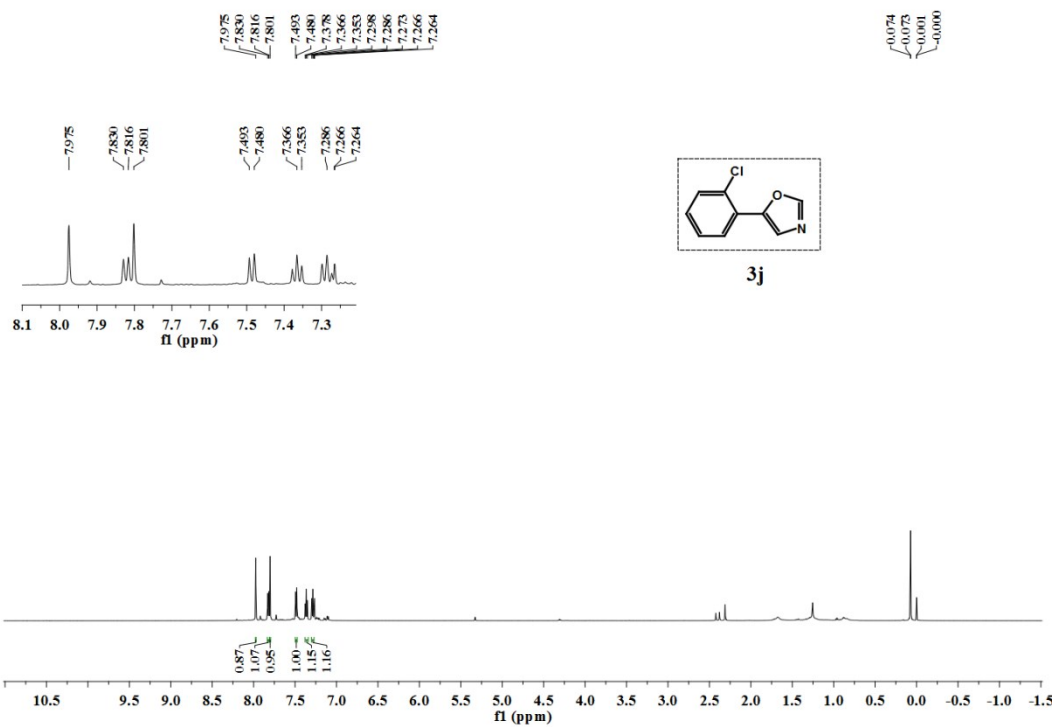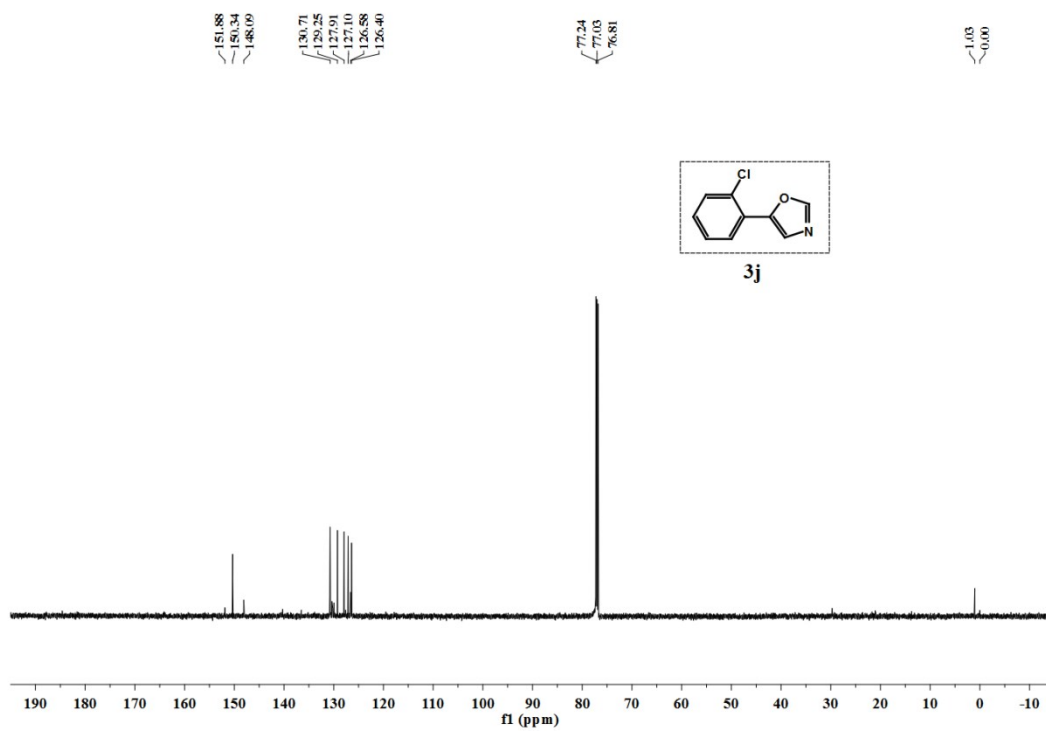

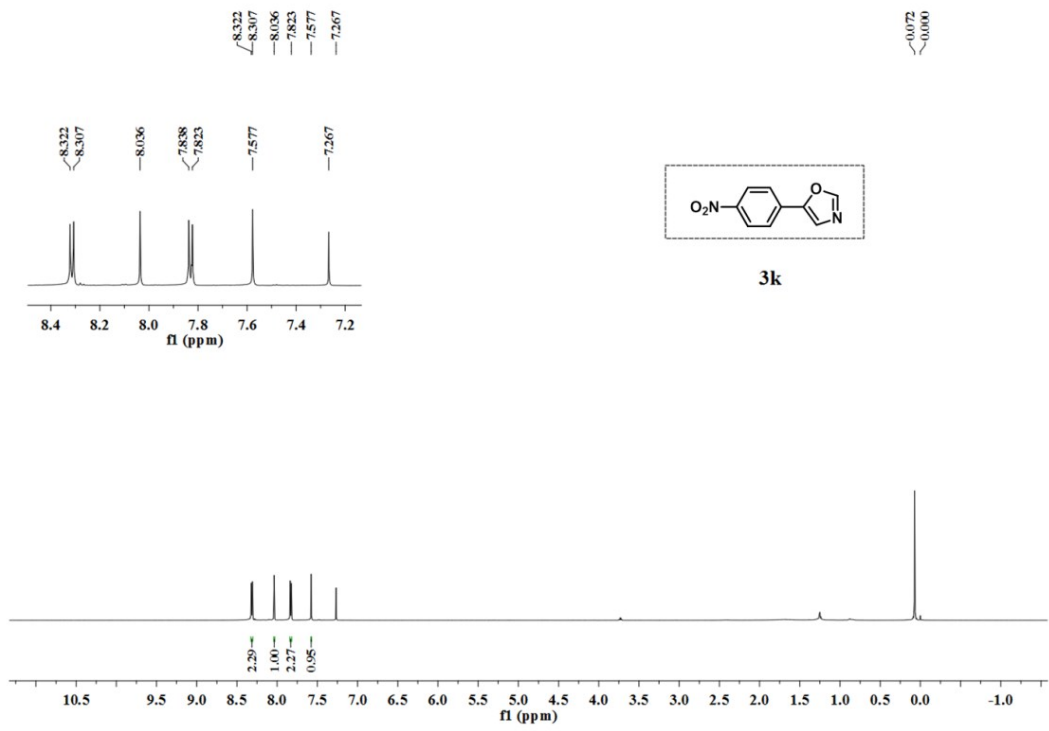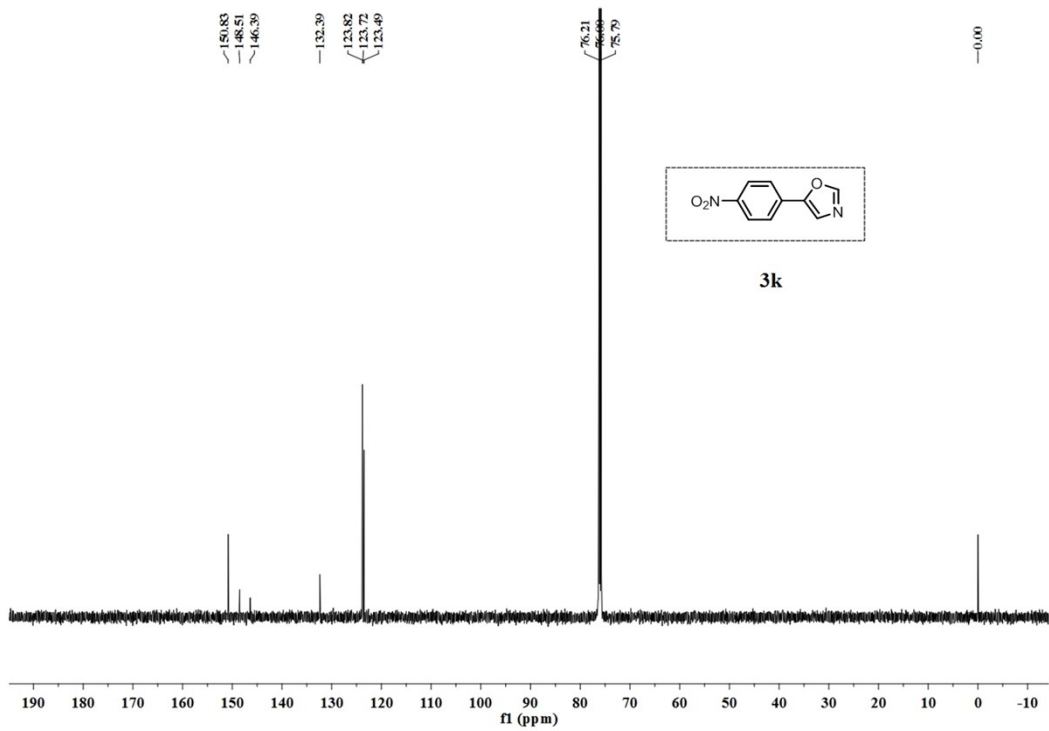

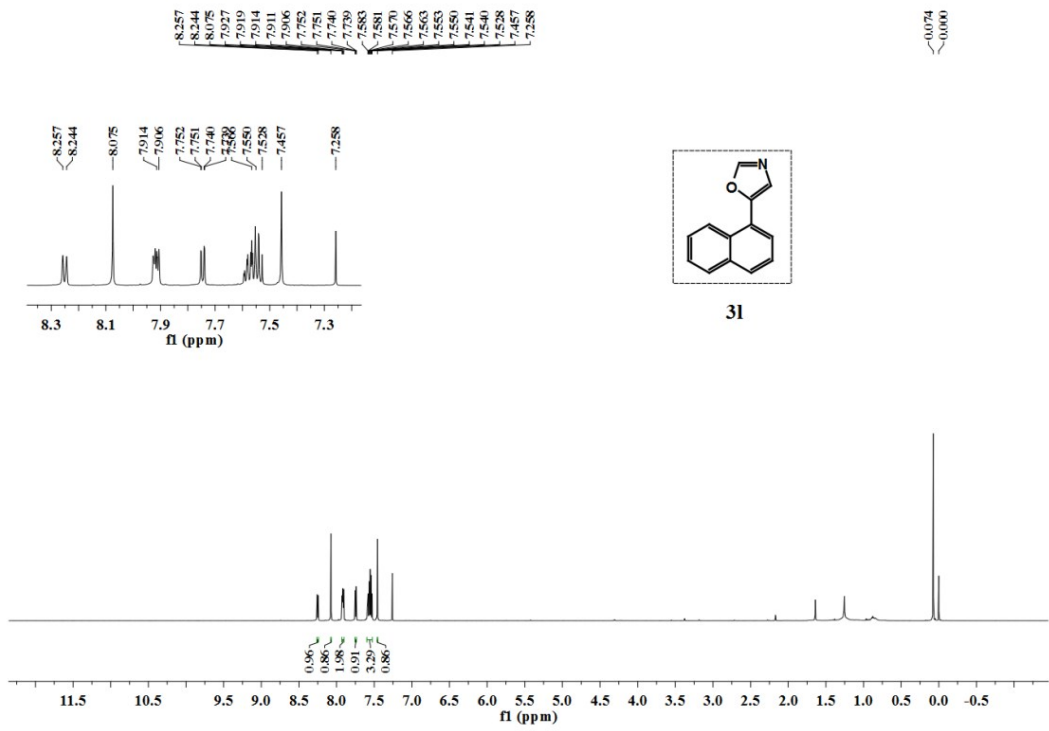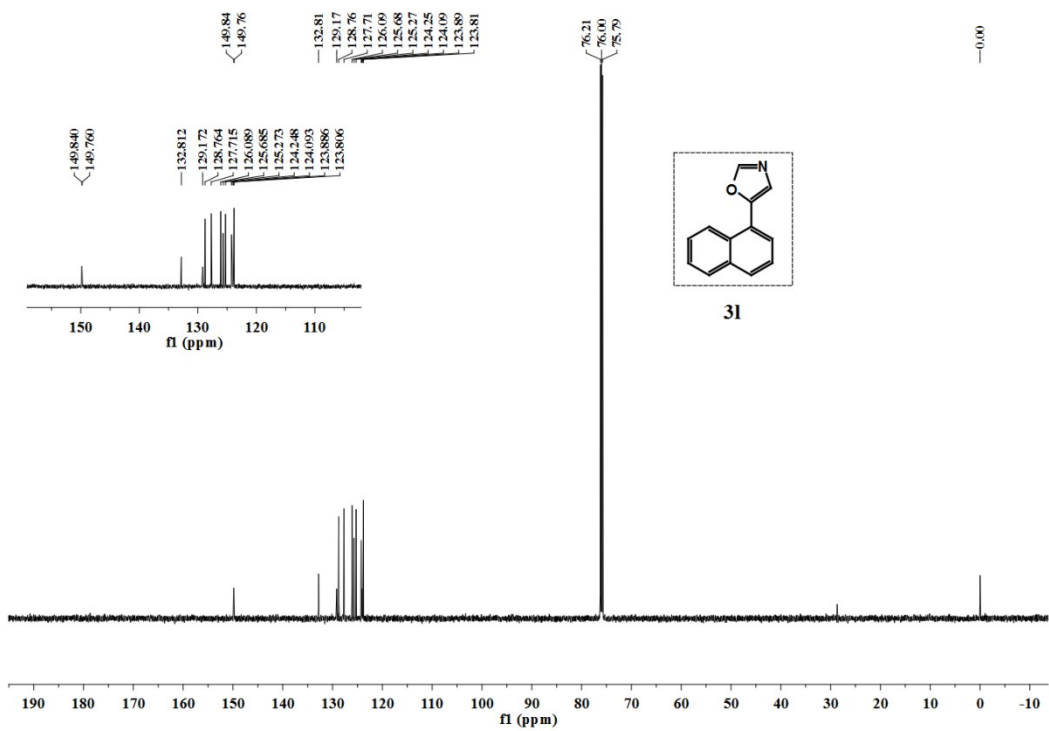

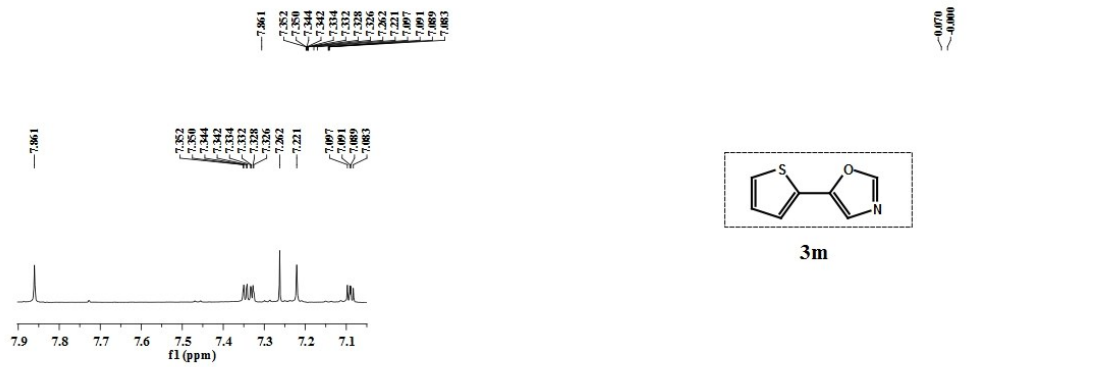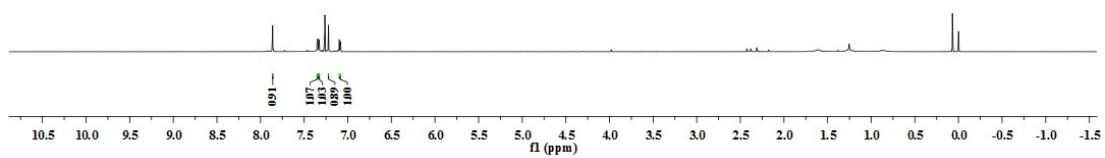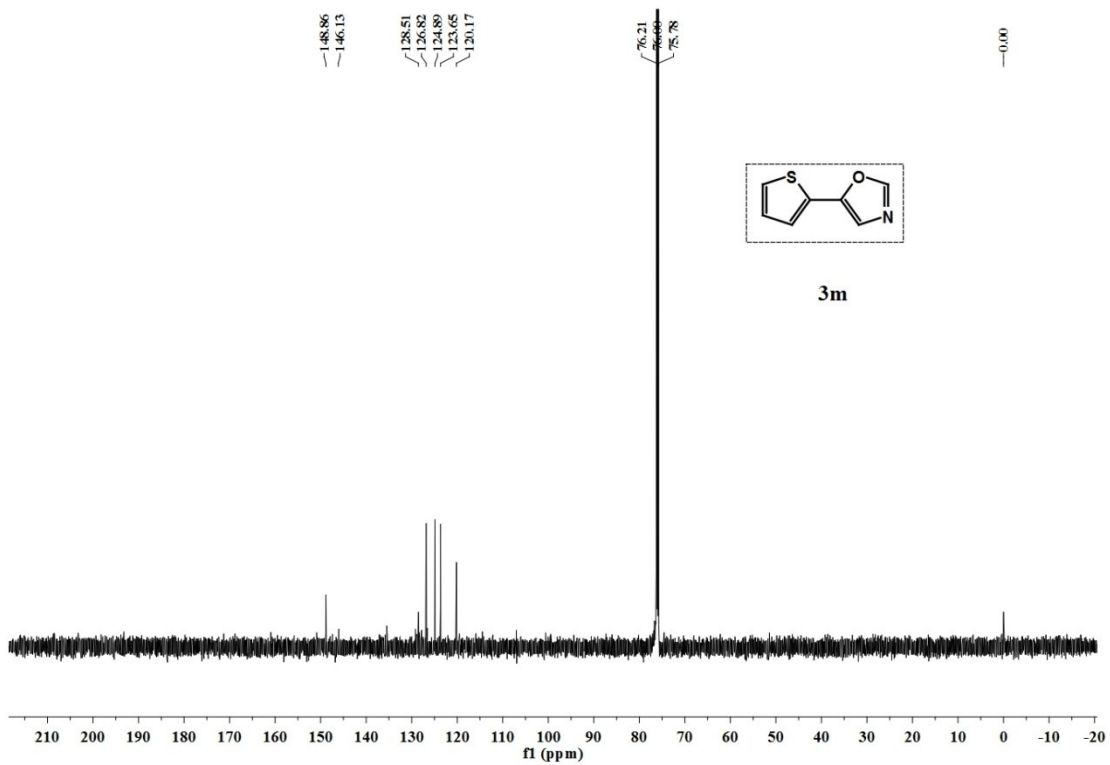

Supplement: c6ra16031j1.pdf [file c6ra16031j1.pdf]
